# Supplementary material for: Dual role of nickel foam in NiCoAl-LDH ensuring high-performance for asymmetric supercapacitors
Source: Royal Society of Chemistry journal article supplement (doi:10.1039/c8nj05447a), 2019-01-01
Supplement: c8nj05447a1.pdf [file c8nj05447a1.pdf]

## Supporting information

# Dual Role of Nickel Foam in NiCoAl-LDH Ensuring High-Performance for Asymmetric Supercapacitors

Peiying Li, Yang Jiao, Shunyu Yao, Lixin Wang, Gang Chen\*

MIT Key Laboratory of Critical Materials Technology for New Energy Conversion  
and Storage

School of Chemistry and Chemical Engineering

Harbin Institute of Technology

Harbin 150001

People's Republic of China

\*Corresponding author: E-mail: [gchen@hit.edu.cn](mailto:gchen@hit.edu.cn)

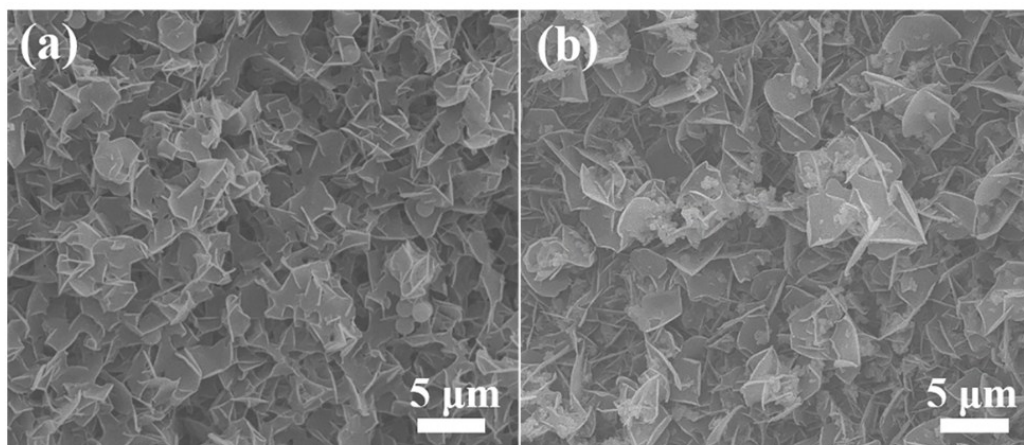

**Fig. S1** SEM images of different hydrothermal reaction time, (a) 4 h, (b) 32 h.

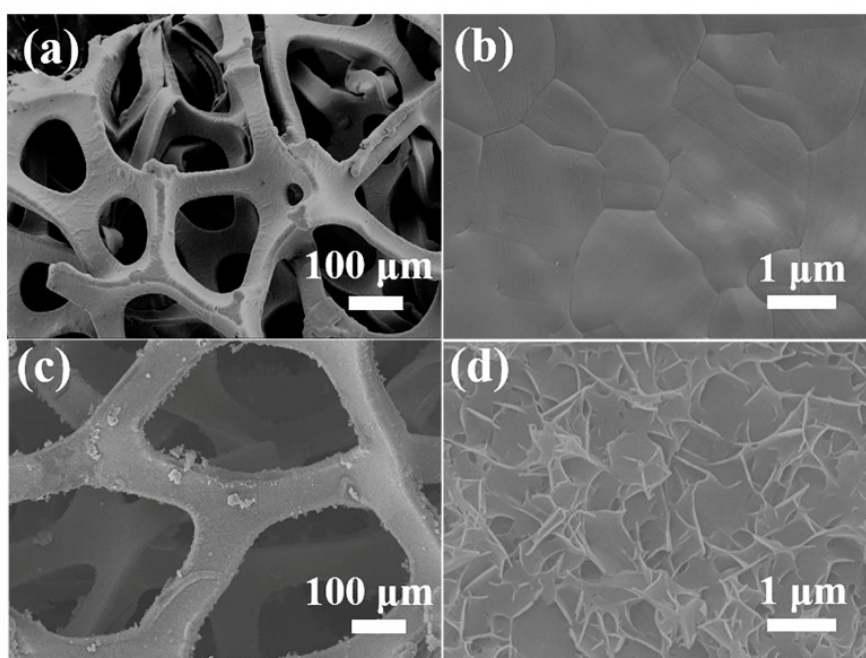

**Fig. S2** SEM images of (a, b) pure NF, (c, d) NF covered with electroactive materials.

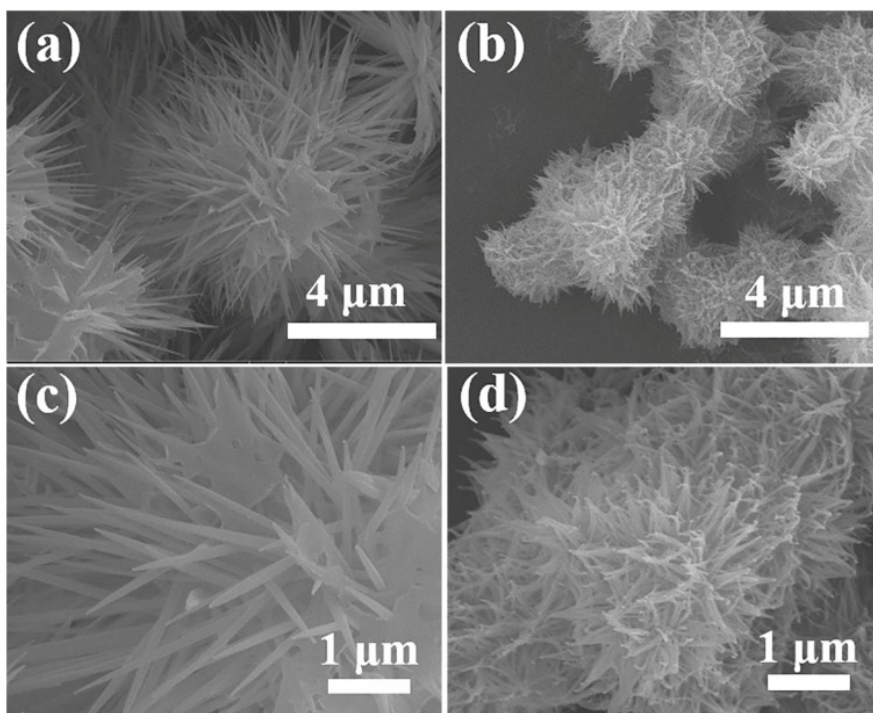

**Fig. S3** SEM images of different proportions of nickel and cobalt ions with adsorbed nickel: (a, c) Ni:Co-1:3, (b, d) Ni:Co-3:1.

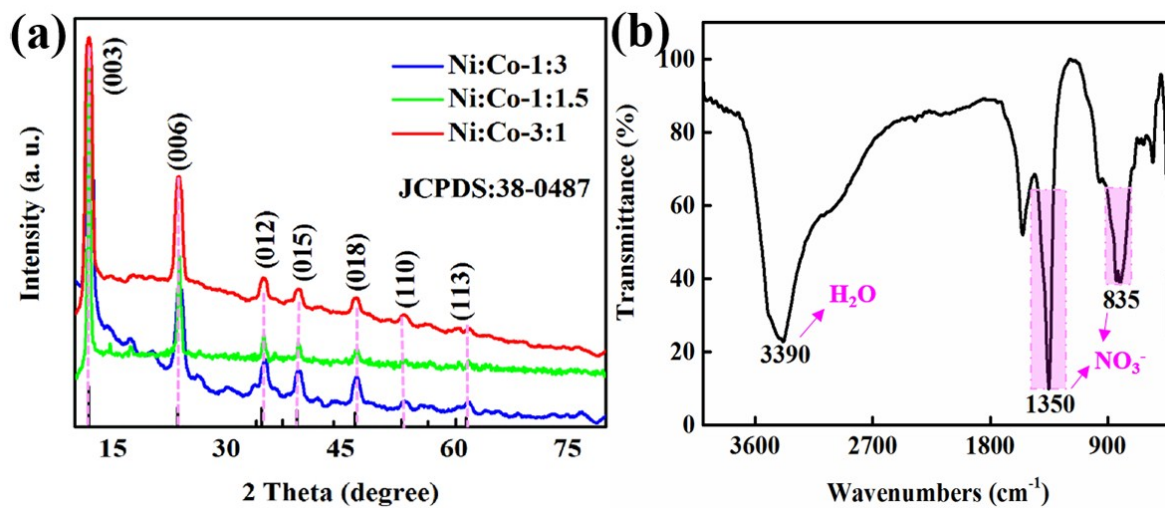

**Fig. S4** (a) XRD patterns of different proportions of nickel and cobalt ions, and (b) FT-IR spectra of NCA (Ni:Co-1:1.5).

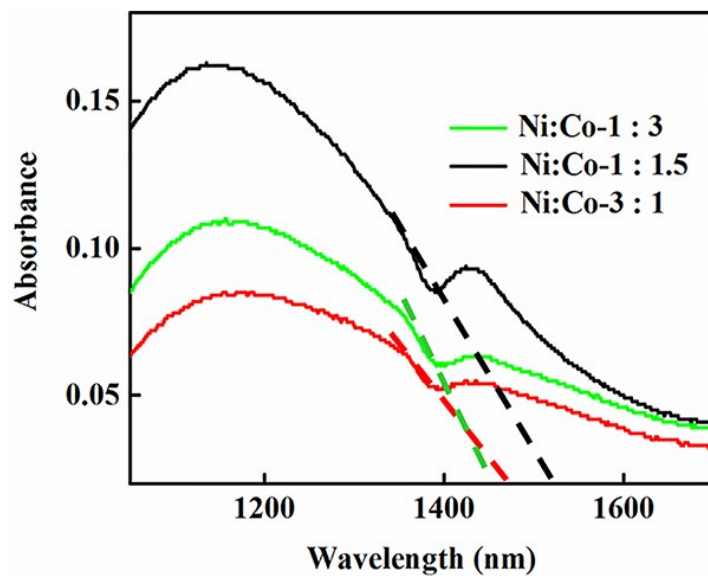

**Fig. S5** UV-visible images of NCA composed of different proportions of nickel and cobalt ions.

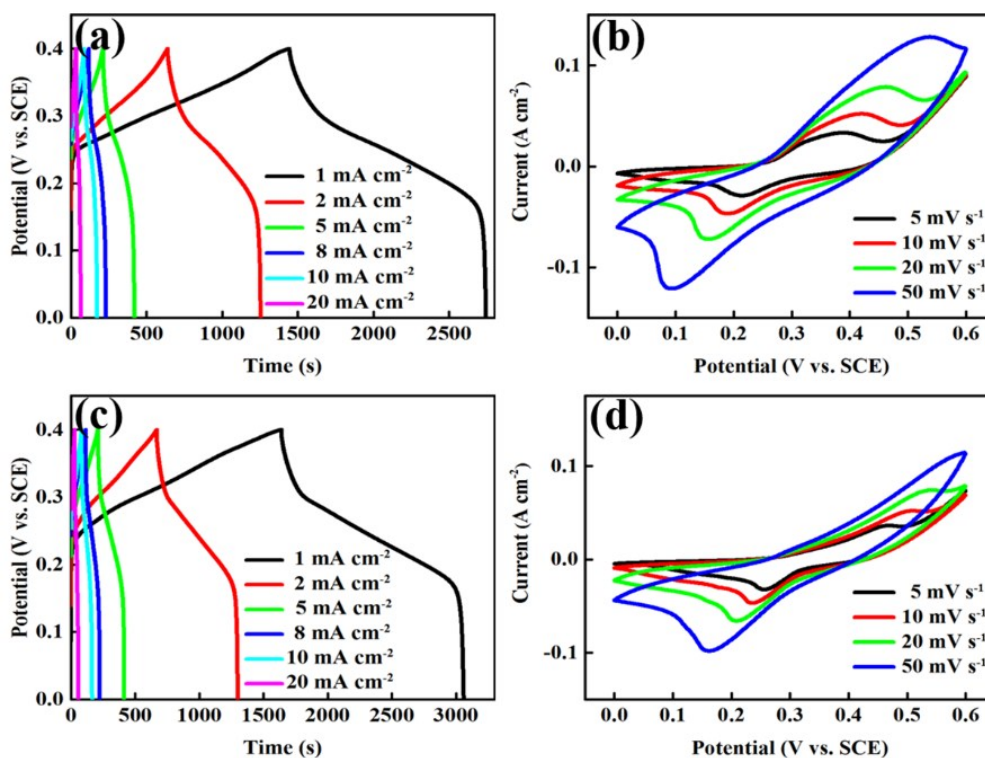

**Fig. S6** Charge-discharge curves and cyclic voltammograms of NCA composed of different proportions of nickel and cobalt ions. (a, b) Ni:Co-1:3, (c, d) Ni:Co-3:1.

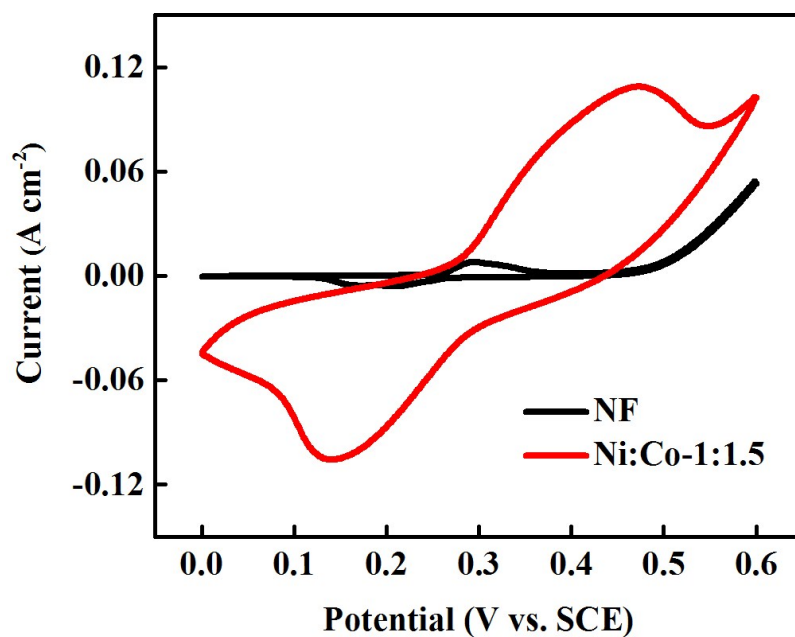

Fig. S7 CV curves comparison at a scan rate of  $20 \text{ mV s}^{-1}$ .

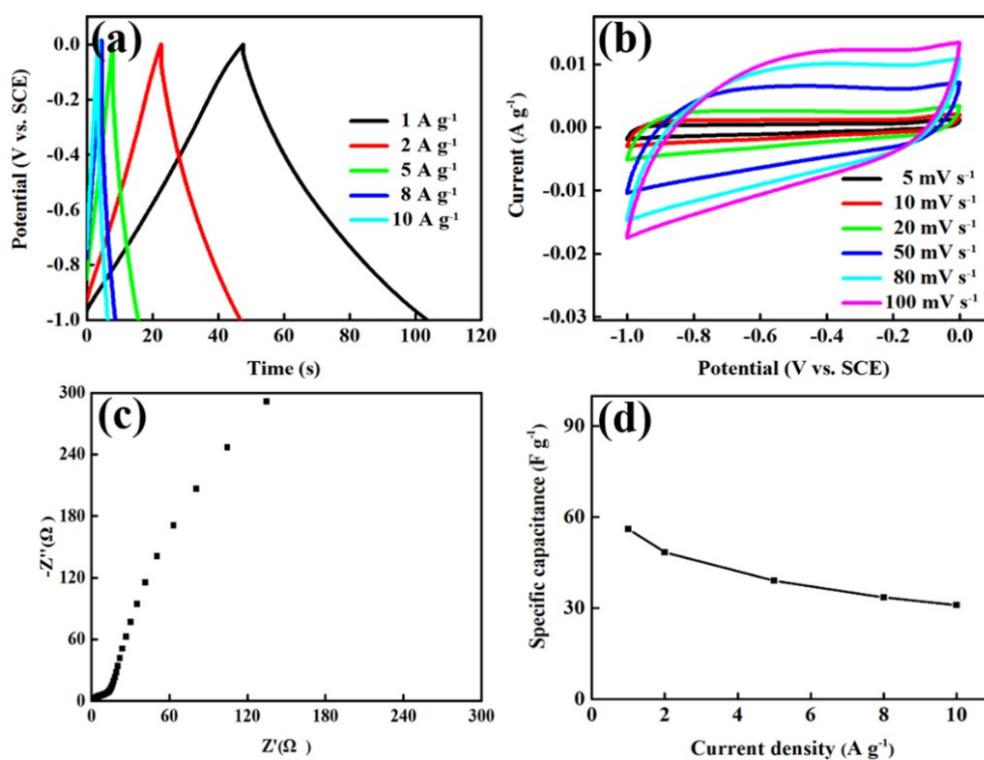

Fig. S8 (a) GCD curves of PAC at different current densities, (b) CV curves of PAC at different scan rates, (c) Nyquist impedance plots, (d) Specific capacitance as a function of discharge current density.

**Table S1** Performance comparison of LDH-based materials.

| <b>Materials</b>       | <b>Potential window (V/SCE)</b> | <b>Morphology</b>           | <b>Capacitance</b>                 | <b>Stability: retention (cycle numbers)</b> | <b>Ref.</b>  |
|------------------------|---------------------------------|-----------------------------|------------------------------------|---------------------------------------------|--------------|
| NiAl-LDHs/<br>MWCNT/NF | 0-0.45                          | Nanosheet/<br>nanotube      | 1293<br>(5 mA cm <sup>-2</sup> )   | 83%<br>(1000)                               | S1           |
| Co–Al LDH/<br>graphene | 0-0.5                           | Laminated<br>structures     | 712<br>(1 A g <sup>-1</sup> )      | 81%<br>(2000)                               | S2           |
| Ni/Co LDHs             | 0.05-0.65                       | Flower-like<br>construction | 2228<br>(1 A g <sup>-1</sup> )     | -                                           | S3           |
| CoNi-LDHs              | -                               | Nanoflakes                  | 855.4<br>(5 mV s <sup>-1</sup> )   | 77%<br>(1000)                               | S4           |
| NCA                    | 0-0.4                           | Nanosheets                  | 5691.2<br>(1 mA cm <sup>-2</sup> ) | 73.5%<br>(3000)                             | This<br>work |

**Table S2** Various performance parameters of NCA (Ni:Co-1:1.5) using the three-electrode system.

| <b>Current density</b><br><b>(mA cm<sup>-2</sup>)</b> | <b>Discharge time (s)</b> | <b>Areal capacitance</b><br><b>(mF cm<sup>-2</sup>)</b> |
|-------------------------------------------------------|---------------------------|---------------------------------------------------------|
| 1                                                     | 2276.5                    | 5691.25                                                 |
| 2                                                     | 896                       | 4480                                                    |
| 5                                                     | 307                       | 3837.5                                                  |
| 8                                                     | 171                       | 3420                                                    |
| 10                                                    | 129                       | 3225                                                    |
| 20                                                    | 51                        | 2550                                                    |

**Table S3** Various performance parameters for our NCA//PAC asymmetric supercapacitors.

| <b>Current density<br/>(mA·cm<sup>-2</sup>)</b> | <b>Discharge<br/>Time<br/>(s)</b> | <b>specific<br/>capacitance<br/>(F·g<sup>-1</sup>)</b> | <b>Energy<br/>density<br/>(W·h·Kg<sup>-1</sup>)</b> | <b>Power density<br/>(W·Kg<sup>-1</sup>)</b> |
|-------------------------------------------------|-----------------------------------|--------------------------------------------------------|-----------------------------------------------------|----------------------------------------------|
| 1                                               | 186.5                             | 116.56                                                 | 41.44                                               | 799.9                                        |
| 2                                               | 53.5                              | 66.88                                                  | 23.78                                               | 1600.15                                      |
| 5                                               | 15                                | 46.88                                                  | 16.67                                               | 4000.8                                       |
| 8                                               | 7.5                               | 37.5                                                   | 13.33                                               | 6398.4                                       |
| 10                                              | 5                                 | 31.25                                                  | 11.11                                               | 7999.2                                       |

### References

- [S1] B. Wang, G. R. Williams, Z. Chang, M. Jiang, J. Liu, X. Lei and X. Sun, ACS Appl. Mater. Interfaces, 2014, **6**, 16304-16311.
- [S2] L. Zhang, X. Zhang, L. Shen, B. Gao, L. Hao, X. Lu, F. Zhang, B. Ding, C. Yuan, J. Power Sources., 2012, **199**, 395-401.
- [S3] T. Li, G. H. Li, L. H. Li, L. Liu, Y. Xu, H. Y. Ding and T. Zhang, ACS Appl. Mater. Interfaces, 2016, **8**, 2562-2572.
- [S4] S. B. Kulkarni, A. D. Jagadale, V. S. Kumbhar, R. N. Bulakhe, S. S. Joshi and C. D. Lokhande, Int. J. Hydrogen Energy, 2013, **38**, 4046-4053.
